# Supplementary material
Source: MDPI journal article supplement (https://www.mdpi.com/2072-4292/13/11/2209)
Supplement: s1 [file s1]

## Swarm ABC, 12/2013-12/2020, QD latitude vs Day of the year

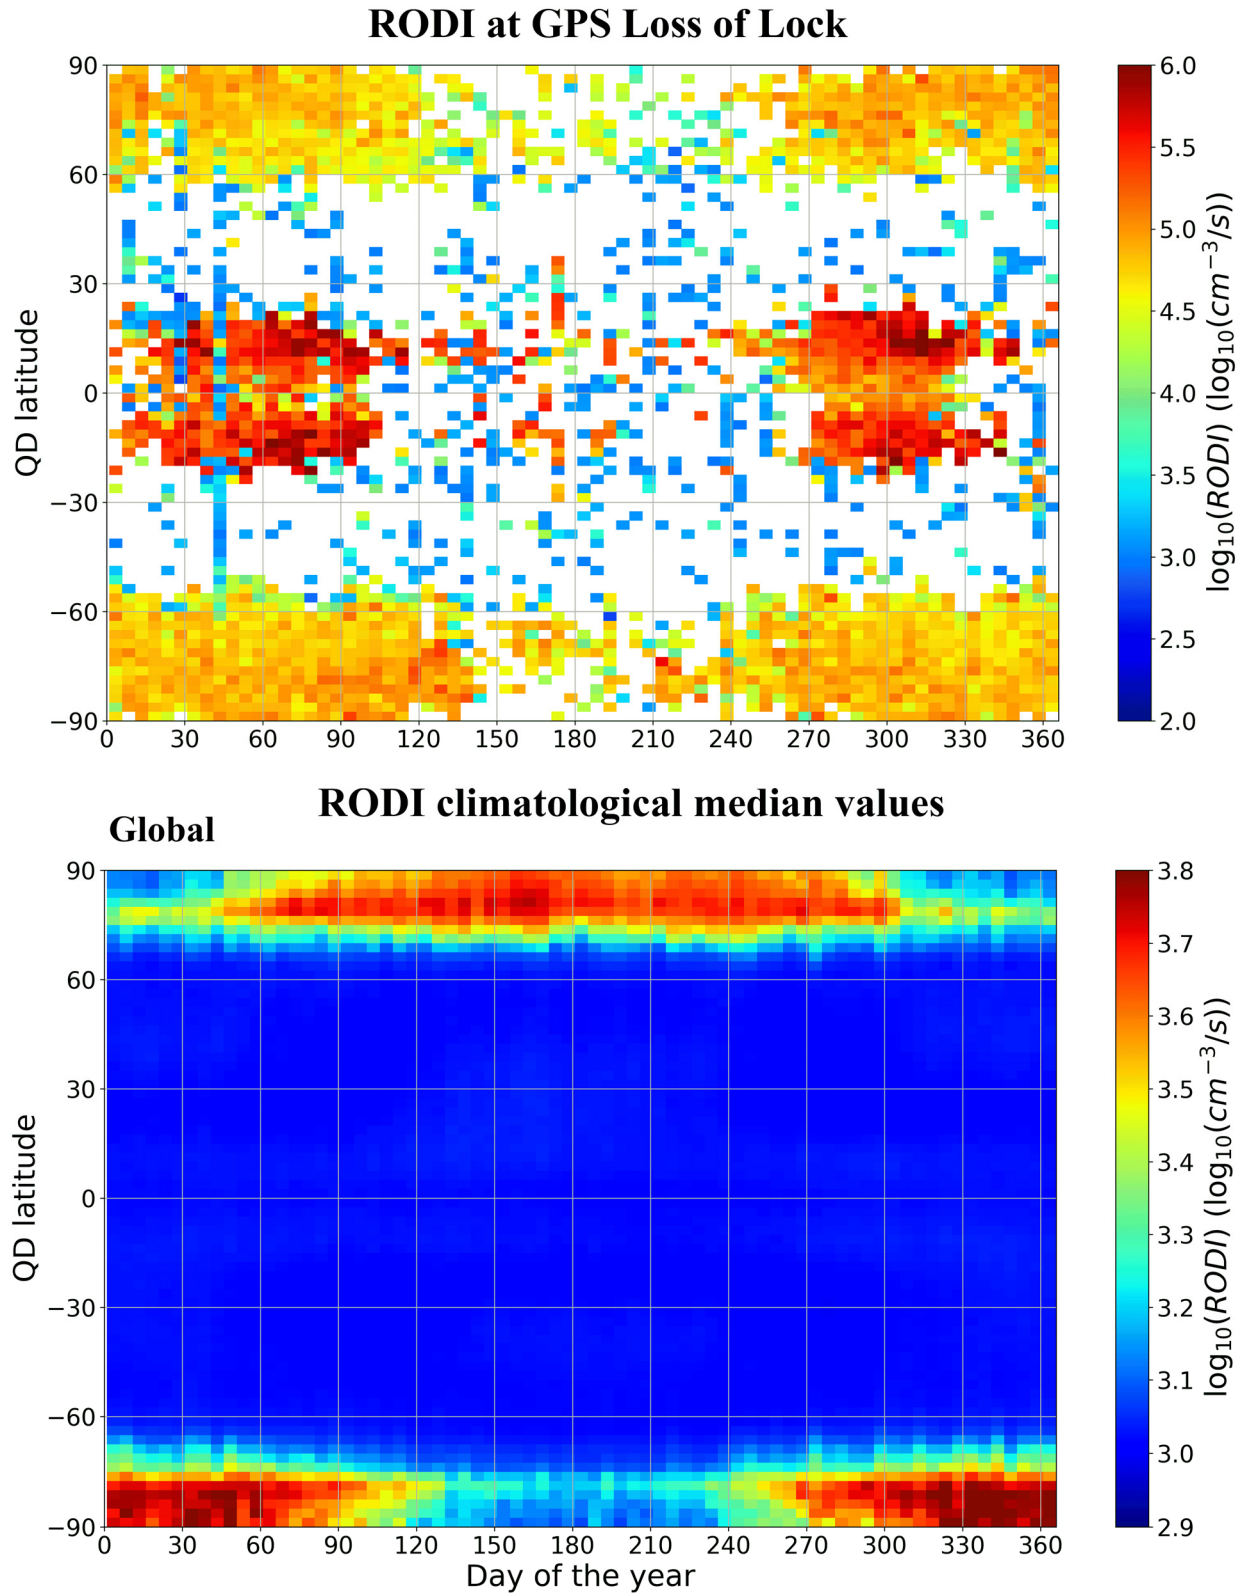

**Figure S1.** Same as Figure 4 but for RODI values at GPS loss of lock (top panel) and RODI climatological median values obtained for the period December 2013-December 2020 taking into account all RODI values and not only those corresponding to a LoL event (bottom panel).

## Swarm ABC, 12/2013-12/2020, QD latitude vs MLT

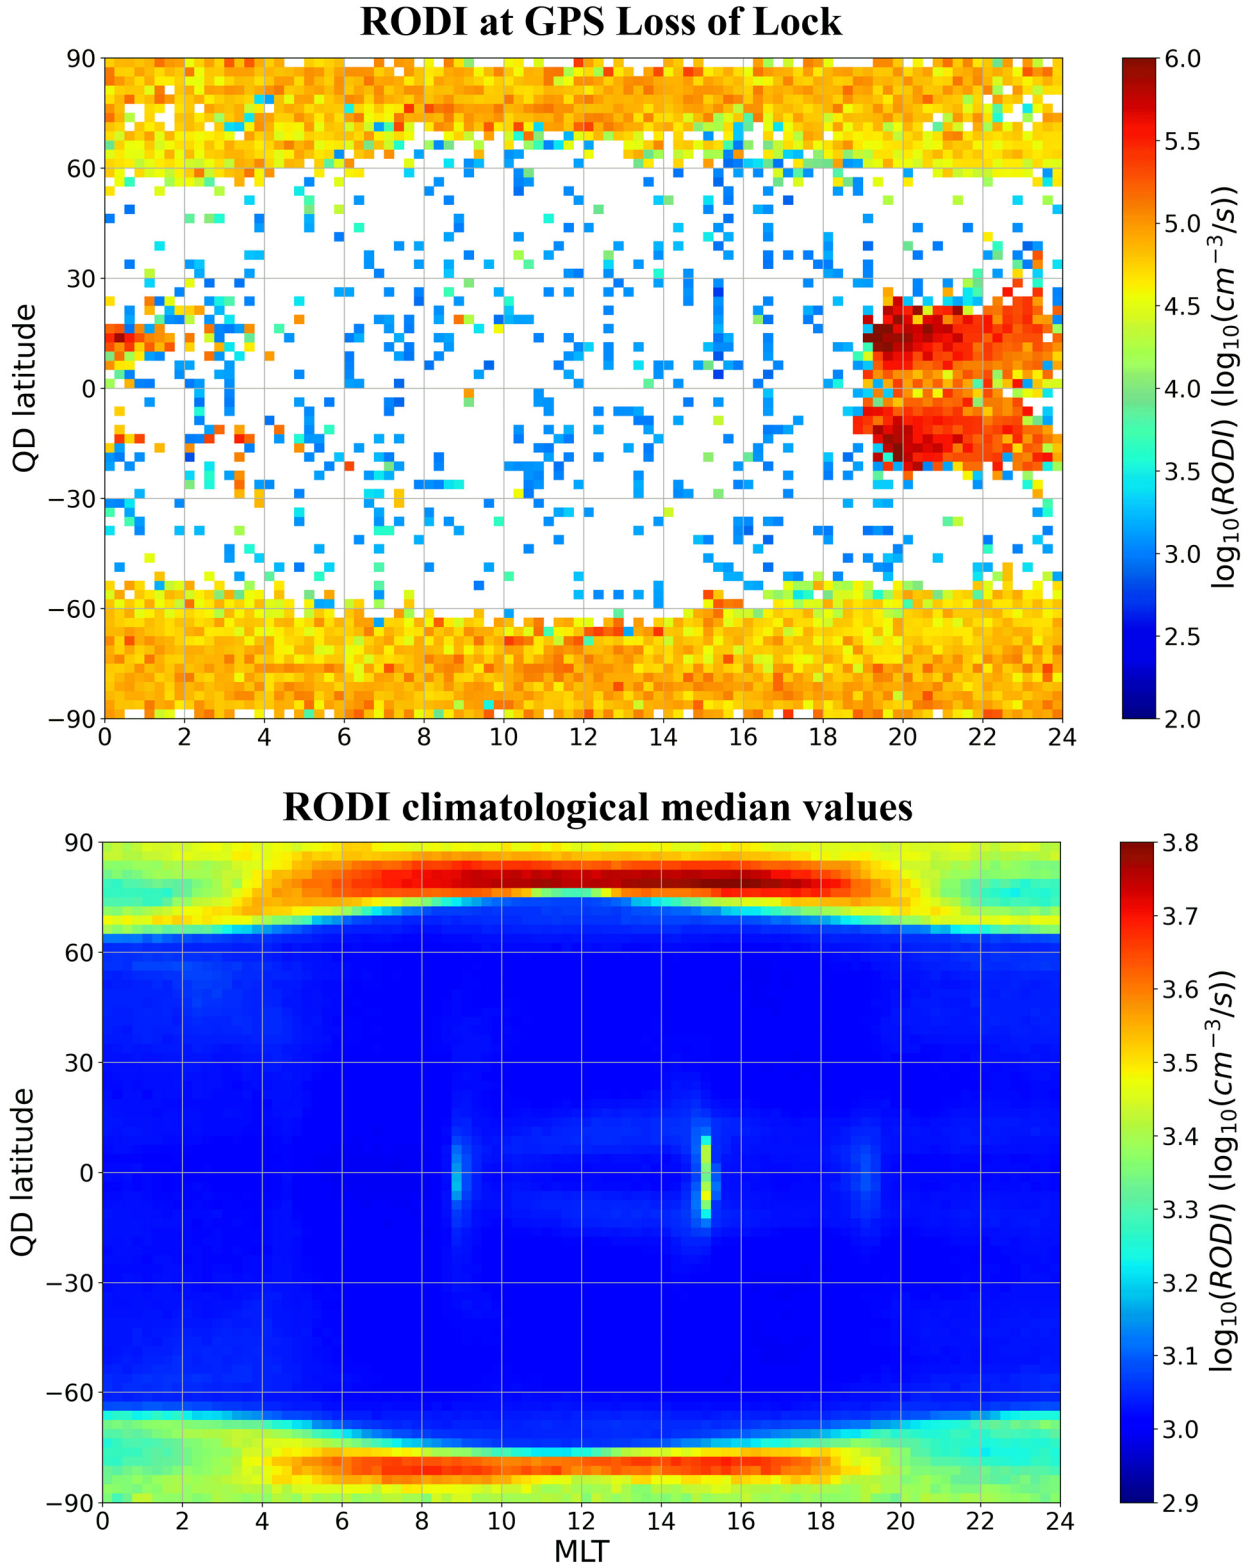

**Figure S2.** Same as top panel of Figure 5 but for RODI values at GPS loss of lock (top panel) and RODI climatological median values obtained for the period December 2013-December 2020 taking into account all RODI values and not only those corresponding to a LoL event (bottom panel).

## Swarm ABC, 12/2013-12/2020, QD latitude vs Day of the year

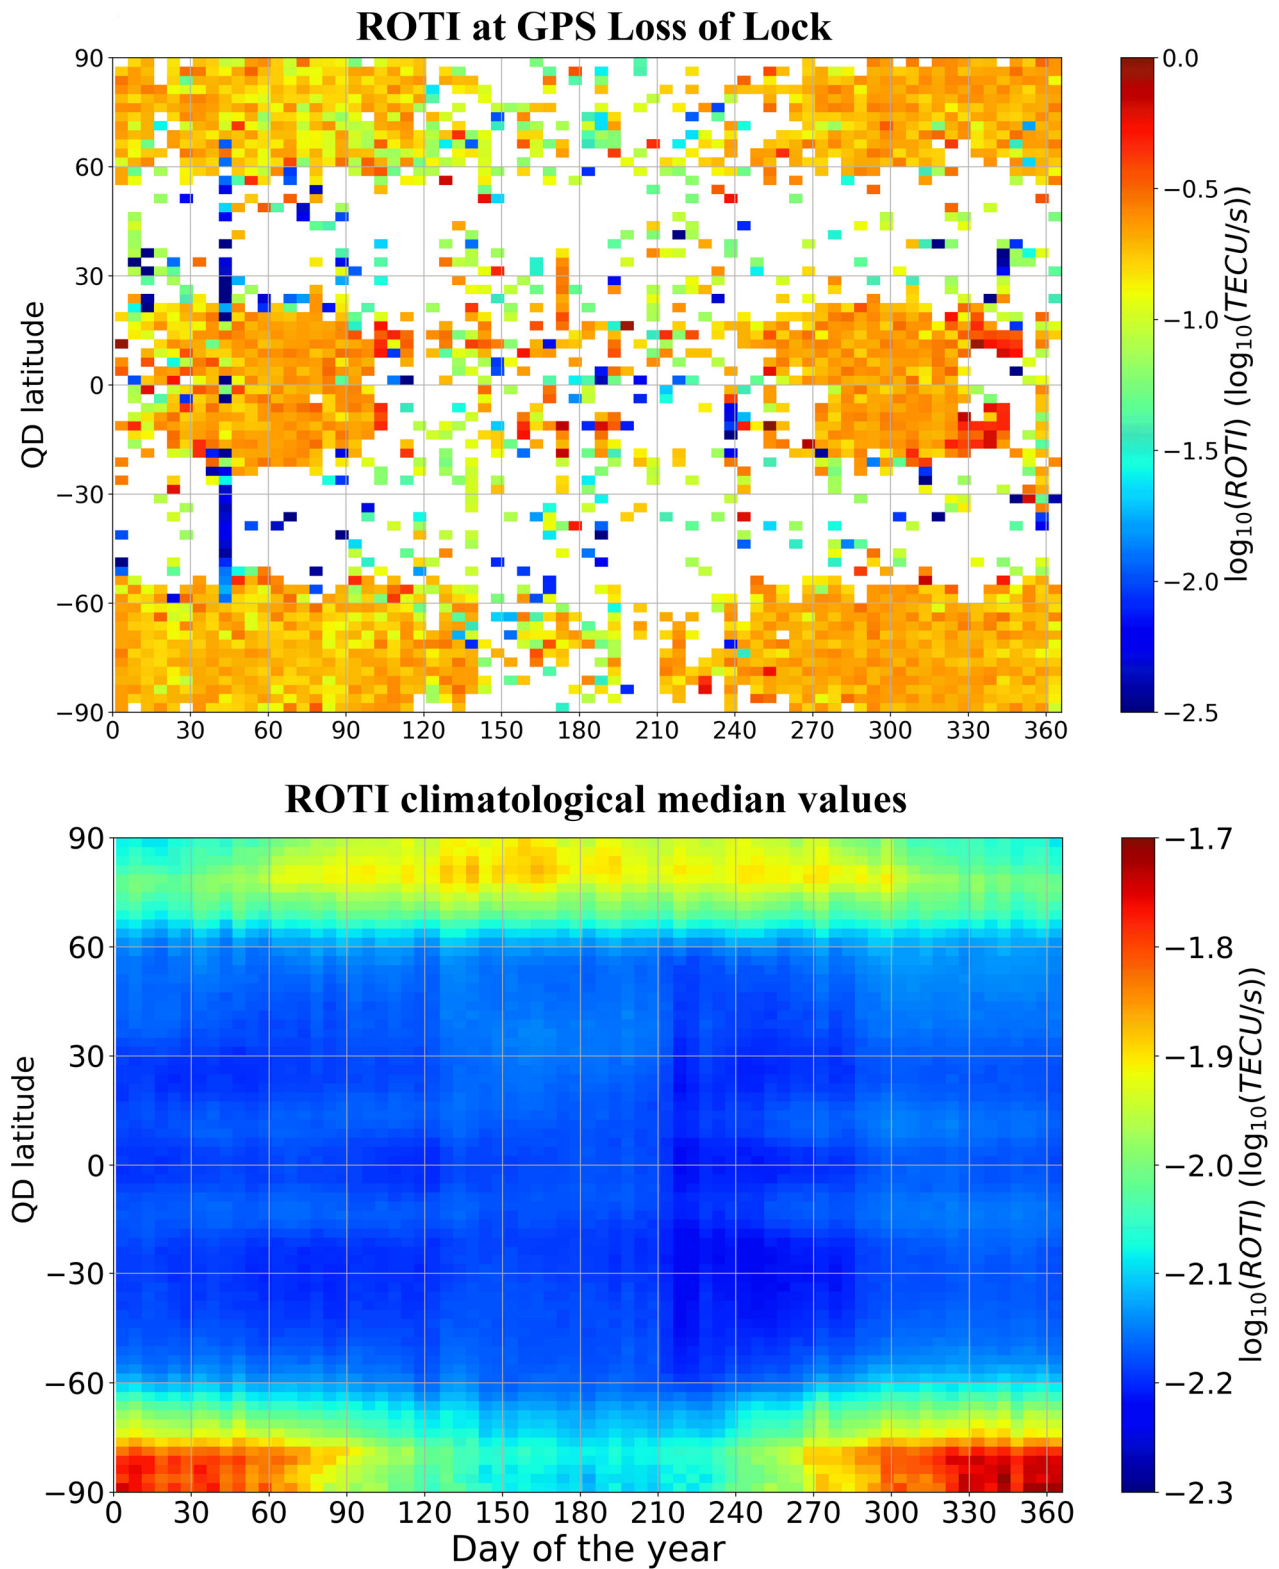

**Figure S3.** Same as Figure 4 but for ROTI values at GPS loss of lock (top panel) and ROTI climatological median values obtained for the period December 2013-December 2020 taking into account all ROTI values and not only those corresponding to a LoL event (bottom panel).

## Swarm ABC, 12/2013-12/2020, QD latitude vs MLT

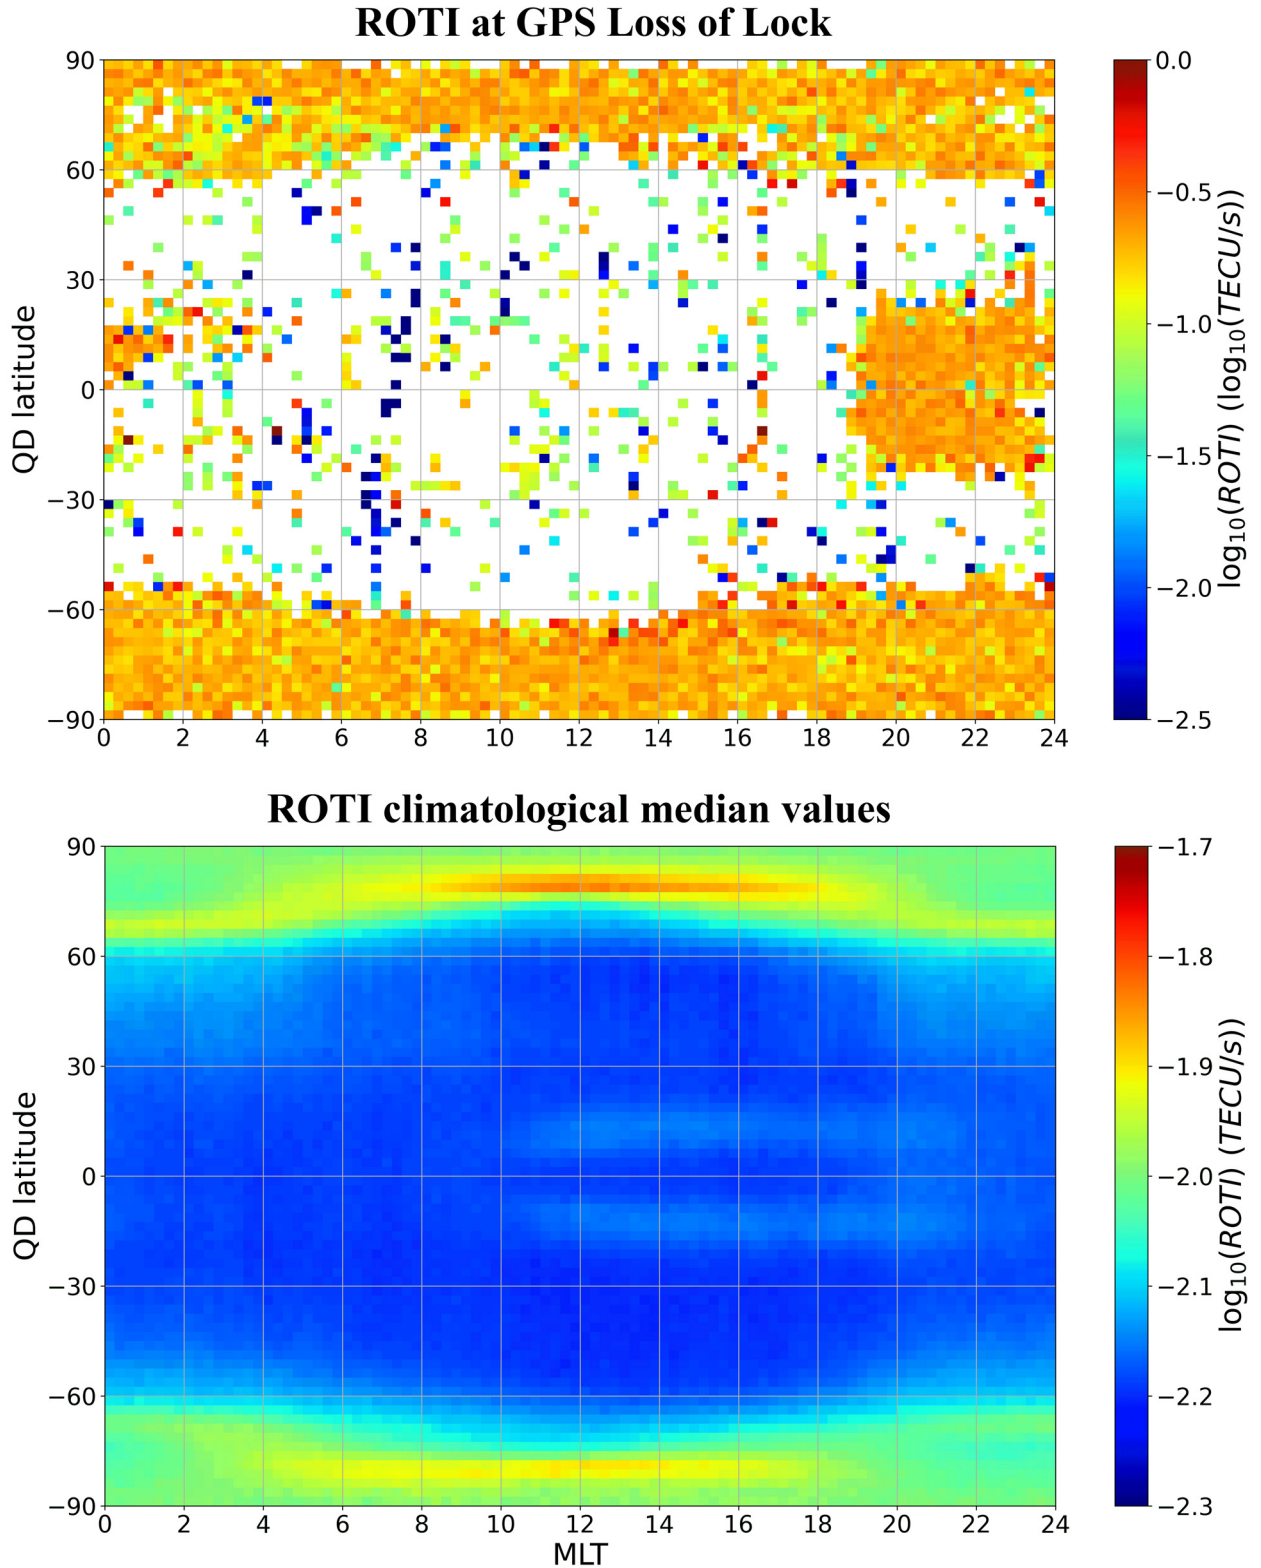

**Figure S4.** Same as top panel of Figure 5 but for ROTI values at GPS loss of lock (top panel) and ROTI climatological median values obtained for the period December 2013-December 2020 taking into account all ROTI values and not only those corresponding to a LoL event (bottom panel).



**RODI at GPS Loss of Lock, Swarm ABC, 01/2014-12/2020, QD latitude vs Day of the year**

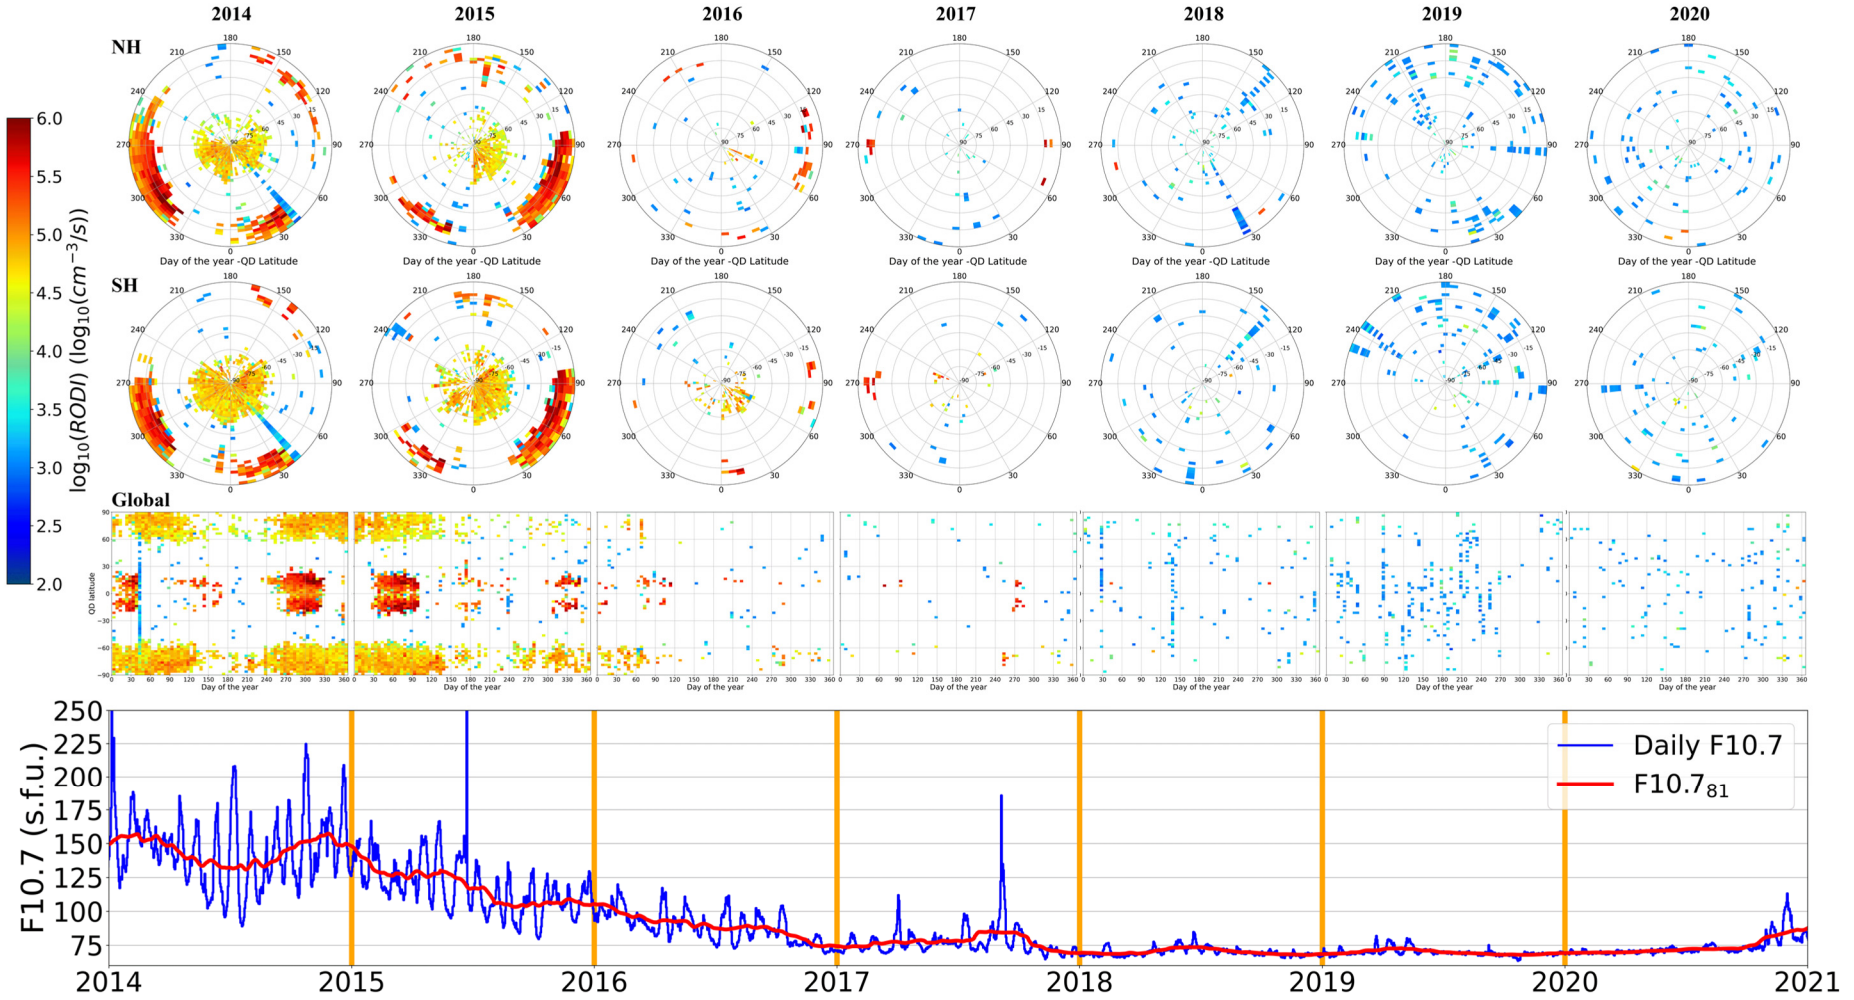

**Figure S5.** Same as Figure 7 but for RODI values at GPS loss of lock.

# ROTI at GPS Loss of Lock, Swarm ABC, 01/2014-12/2020, QD latitude vs Day of the year

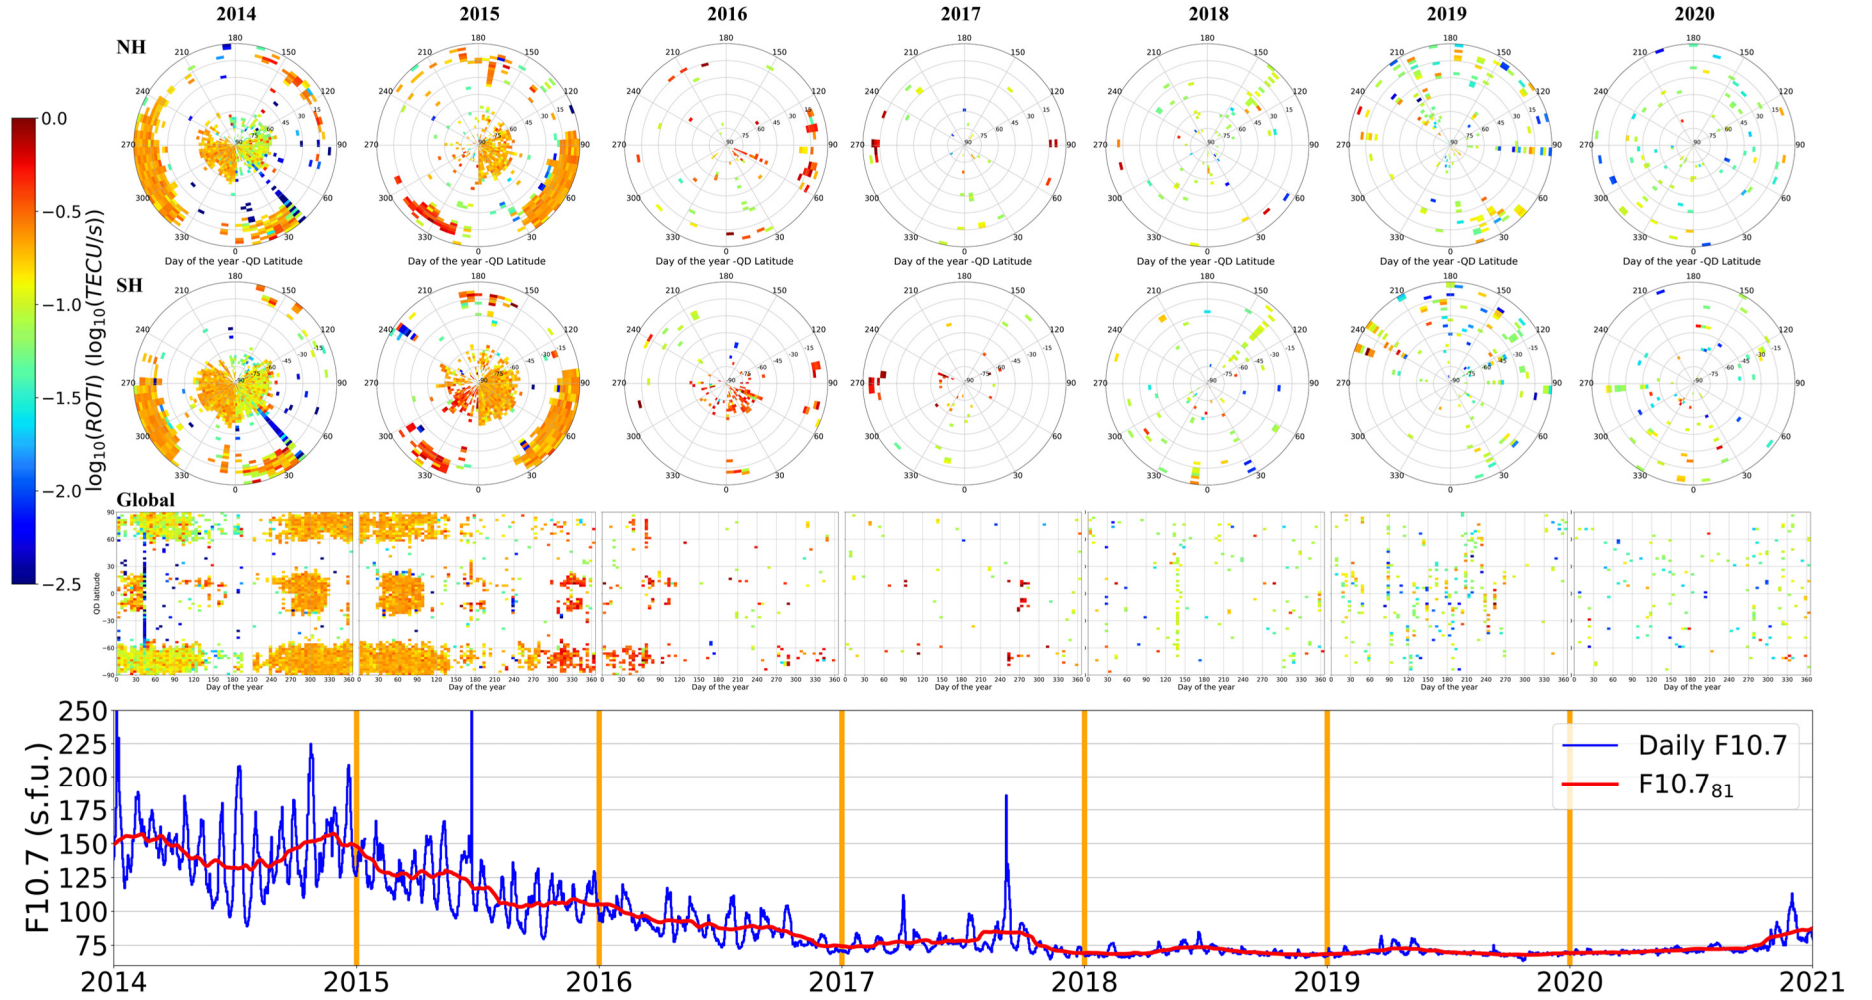

Figure S6. Same as Figure 7 but for ROTI values at GPS loss of lock.
